# Supplementary material for: Modelling Smoke Flavour in Wine from Chemical Composition of Smoke-Exposed Grapes and Wine
Source: Hindawi journal article supplement (doi:10.1155/2023/4964850), 2023-04-21
Supplement: f1 [file 4964850.f1.docx]

### Supplementary information

###### Table S1. Study B Region and basic wine composition.

| Wine code | Region | Alcohol [% v/v] | G&F  [g/L] | pH | Titratable Acidity  [g/L] | Malic Acid  [g/L] | Volatile Acid  [g/L] | Free SO2 [mg/L] | Total SO2 [mg/L] |
| --- | --- | --- | --- | --- | --- | --- | --- | --- | --- |
| CHA-01-Control | Langhorne Creek | 14.9 | 1.4 | 3.56 | 7.1 | 3.44 | 0.51 | 23 | 133 |
| CHA-02-Control | Adelaide Hills | 15.8 | 2.9 | 3.68 | 7.9 | 3.72 | 0.32 | 20 | 141 |
| CHA-03-Smoke | Adelaide Hills | 14.9 | 0.8 | 3.71 | 8.4 | 5.32 | 0.58 | 27 | 160 |
| CHA-04-Smoke | Adelaide Hills | 15.5 | 2.6 | 3.66 | 8.3 | 4.37 | 0.34 | 18 | 146 |
| CHA-05-Smoke | King Valley | 15.2 | 1.3 | 3.46 | 7.5 | 3.74 | 0.22 | 22 | 131 |
| CHA-06-Smoke | Adelaide Hills | 14.7 | 1.2 | 3.53 | 7.0 | 3.22 | 0.48 | 27 | 160 |
| CHA-07-Smoke | King Valley | 13.8 | 1.1 | 3.31 | 7.7 | 3.42 | 0.46 | 21 | 143 |
| CHA-08-Smoke | Cowra | 12.0 | 0.7 | 3.47 | 5.8 | 2.25 | 0.3 | 27 | 167 |
| CHA-09-Smoke | King Valley | 14.0 | 1.3 | 3.35 | 7.1 | 3.26 | 0.41 | 26 | 139 |
| CHA-10-Smoke | Beechworth | 15.1 | 0.6 | 3.63 | 6.6 | 2.95 | 0.26 | 28 | 150 |
| CHA-11-Smoke | Canberra | 13.3 | 0.9 | 3.47 | 7.1 | 3.54 | 0.44 | 21 | 151 |
| CHA-12-Smoke | Alpine Valleys | 15.4 | 1.9 | 3.67 | 7.1 | 3.59 | 0.30 | 25 | 146 |
| PIN-01-Control | Adelaide Hills | 11.1 | 0.5 | 3.53 | 5.0 | <0.05 | 0.41 | 26 | 85 |
| PIN-02-Control | Adelaide Hills | 12.7 | 0.4 | 3.54 | 6.4 | 0.06 | 0.44 | 22 | 96 |
| PIN-03-Control | Adelaide Hills | 14.1 | 0.3 | 3.54 | 5.8 | <0.05 | 0.4 | 28 | 87 |
| PIN-04-Smoke | Orange | 13.8 | 0.7 | 3.54 | 5.8 | 0.14 | 0.59 | 29 | 88 |
| PIN-05-Smoke | Orange | 13.4 | 0.5 | 3.51 | 5.0 | 0.05 | 0.42 | 24 | 74 |
| PIN-06-Smoke | King Valley | 15.1 | 0.6 | 3.55 | 6.0 | <0.05 | 0.54 | 23 | 69 |
| PIN-07-Smoke | King Valley | 13.2 | 0.4 | 3.51 | 5.3 | 0.06 | 0.55 | 26 | 65 |
| PIN-08-Smoke | Orange | 13.6 | 0.8 | 3.54 | 5.4 | 0.05 | 0.45 | 27 | 81 |
| PIN-09-Smoke | Alpine Valleys | 15.1 | 0.9 | 3.54 | 5.9 | <0.05 | 0.45 | 27 | 89 |
| PIN-10-Smoke | Alpine Valleys | 13.5 | 0.6 | 3.51 | 5.7 | <0.05 | 0.37 | 26 | 80 |
| PIN-11-Smoke | Canberra | 12.2 | <0.3 | 3.48 | 5.3 | 0.05 | 0.52 | 28 | 67 |
| PIN-12-Smoke | Canberra | 11.4 | <0.3 | 3.45 | 5.4 | 0.06 | 0.60 | 24 | 93 |
| SHI-01-Control | Adelaide Hills | 14.8 | 0.6 | 3.48 | 7.6 | 0.20 | 0.47 | 31 | 69 |
| SHI-02-Control | McLaren Vale | 13.3 | 0.6 | 3.53 | 6.8 | <0.05 | 0.37 | 28 | 55 |
| SHI-03-Control | McLaren Vale | 12.8 | <0.3 | 3.61 | 6.3 | 0.06 | 0.31 | 27 | 65 |
| SHI-04-Smoke | Barossa | 15.0 | 0.7 | 3.57 | 6.8 | <0.05 | 0.51 | 33 | 62 |
| SHI-05-Smoke | Barossa | 14.9 | 0.6 | 3.51 | 6.7 | 0.05 | 0.55 | 28 | 57 |
| SHI-06-Smoke | Riverina | 13.4 | 0.4 | 3.64 | 5.9 | 0.06 | 0.40 | 28 | 58 |
| SHI-07-Smoke | King Valley | 13.4 | 0.4 | 3.58 | 6.5 | <0.05 | 0.40 | 24 | 56 |
| SHI-08-Smoke | Orange | 14.8 | 0.6 | 3.53 | 6.5 | 0.05 | 0.46 | 28 | 52 |
| SHI-09-Smoke | Orange | 14.1 | 0.6 | 3.45 | 6.6 | <0.05 | 0.38 | 25 | 48 |
| SHI-10-Smoke | Mudgee | 14.2 | <0.3 | 3.40 | 6.6 | <0.05 | 0.39 | 31 | 64 |
| SHI-11-Smoke | Mudgee | 14.0 | 0.6 | 3.53 | 6.2 | <0.05 | 0.44 | 31 | 67 |
| SHI-12-Smoke | King Valley | 13.9 | <0.3 | 3.68 | 6.5 | <0.05 | 0.53 | 31 | 65 |
| SHI-13-Smoke | Canberra | 15.2 | 0.8 | 3.54 | 6.3 | <0.05 | 0.42 | 30 | 64 |
| SHI-14-Smoke | Beechworth | 15.4 | 0.7 | 3.60 | 6.4 | <0.05 | 0.45 | 30 | 68 |
| SHI-15-Smoke | Beechworth | 14.4 | 0.6 | 3.59 | 6.4 | <0.05 | 0.51 | 28 | 56 |
| SHI-16-Smoke | Alpine Valleys | 14.7 | 0.6 | 3.69 | 6.0 | 0.05 | 0.41 | 34 | 73 |

CHA: Chardonnay; PIN: Pinot Noir; SHI: Shiraz. Titratable acidity is determined with an end-point of pH 8.2.

###### Table S2. Water additions made to musts of Study B to reduce high soluble solids.

| Wine code | Water Addition % v/v |
| --- | --- |
| CHA-02-Control | 7.20% |
| SHI-01-Control | 11.20% |
| SHI-04-Smoke | 6.50% |
| SHI-08-Smoke | 7.10% |
| SHI-13-Smoke | 5.40% |
| SHI-14-Smoke | 13.20% |
| SHI-16-Smoke | 5.30% |

CHA: Chardonnay; SHI: Shiraz

###### Table S3. Study B. Concentration of volatile phenols and phenolic glycosides in grapes

| Sample Code | 4-Methyl-guaiacol (µg/kg) | Guaiacol (µg/kg) | *o*-cresol(µg/kg) | *m*-cresol (µg/kg) | *p*-cresol(µg/kg) | GuRG (µg/kg) | MGuRG (µg/kg) | MSyGG (µg/kg) | PhRG (µg/kg) | CrRG (µg/kg) | SyGG (µg/kg) |
| --- | --- | --- | --- | --- | --- | --- | --- | --- | --- | --- | --- |
| CHA-01-Control | <LoQ | <LoQ | <LoQ | <LoQ | <LoQ | <LoQ | <LoQ | <LoQ | <LoQ | <LoQ | <LoQ |
| CHA-02-Control | <LoQ | 1 | 2 | <LoQ | <LoQ | 1 | 1 | 2 | <LoQ | <LoQ | 3 |
| CHA-03-Smoke | 2 | 8 | 7 | 3 | <LoQ | 3 | 3 | 7 | 3 | 2 | 32 |
| CHA-04-Smoke | 2 | 5 | 4 | 2 | <LoQ | 3 | 3 | 6 | 4 | 2 | 41 |
| CHA-05-Smoke | <LoQ | 3 | 3 | <LoQ | <LoQ | 2 | 4 | 7 | 5 | 3 | 41 |
| CHA-06-Smoke | 1 | 4 | 4 | 1 | <LoQ | 3 | 3 | 7 | 5 | 2 | 52 |
| CHA-07-Smoke | 1 | 4 | 5 | 1 | <LoQ | 3 | 5 | 10 | 7 | 5 | 65 |
| CHA-08-Smoke | <LoQ | 1 | 1 | <LoQ | <LoQ | 2 | 11 | 7 | 6 | 7 | 70 |
| CHA-09-Smoke | 1 | 4 | 4 | <LoQ | <LoQ | 4 | 8 | 15 | 10 | 6 | 101 |
| CHA-10-Smoke | 2 | 6 | 8 | 2 | 1 | 11 | 18 | 42 | 76 | 13 | 408 |
| CHA-11-Smoke | 10 | 33 | 28 | 9 | 4 | 16 | 27 | 57 | 66 | 20 | 552 |
| CHA-12-Smoke | 4 | 15 | 20 | 6 | 2 | 18 | 23 | 73 | 151 | 18 | 868 |
| PIN-01-Control | <LoQ | <LoQ | 1 | <LoQ | <LoQ | <LoQ | <LoQ | <LoQ | <LoQ | <LoQ | 1 |
| PIN-02-Control | <LoQ | <LoQ | <LoQ | <LoQ | <LoQ | <LoQ | <LoQ | <LoQ | <LoQ | <LoQ | 2 |
| PIN-03-Control | <LoQ | <LoQ | 1 | <LoQ | <LoQ | <LoQ | <LoQ | <LoQ | <LoQ | <LoQ | 2 |
| PIN-04-Smoke | <LoQ | 3 | 5 | 1 | <LoQ | 2 | 7 | 5 | 2 | 9 | 21 |
| PIN-05-Smoke | <LoQ | 4 | 3 | <LoQ | <LoQ | 3 | 8 | 7 | 2 | 10 | 26 |
| PIN-06-Smoke | <LoQ | 2 | 3 | <LoQ | <LoQ | 2 | 4 | 4 | 2 | 5 | 31 |
| PIN-07-Smoke | <LoQ | 2 | 3 | <LoQ | <LoQ | 3 | 13 | 10 | 5 | 10 | 53 |
| PIN-08-Smoke | <LoQ | 7 | 7 | 2 | <LoQ | 6 | 12 | 11 | 4 | 12 | 56 |
| PIN-09-Smoke | <LoQ | 6 | 5 | <LoQ | <LoQ | 5 | 9 | 14 | 11 | 9 | 120 |
| PIN-10-Smoke | 2 | 10 | 8 | 2 | <LoQ | 6 | 14 | 28 | 20 | 15 | 230 |
| PIN-11-Smoke | 3 | 20 | 15 | 4 | 2 | 19 | 49 | 48 | 32 | 47 | 432 |
| PIN-12-Smoke | 2 | 11 | 9 | 2 | 1 | 17 | 45 | 47 | 35 | 43 | 456 |
| SHI-01-Control | <LoQ | 4 | <LoQ | <LoQ | <LoQ | 4 | 2 | 3 | <LoQ | <LoQ | 3 |
| SHI-02-Control | <LoQ | 3 | 1 | <LoQ | <LoQ | 2 | 1 | 1 | <LoQ | <LoQ | 4 |
| SHI-03-Control | <LoQ | 10 | 2 | <LoQ | <LoQ | 3 | 1 | 1 | <LoQ | <LoQ | 5 |
| SHI-04-Smoke | <LoQ | 6 | 2 | <LoQ | <LoQ | 6 | 4 | 5 | 3 | 3 | 24 |
| SHI-05-Smoke | <LoQ | 5 | 1 | <LoQ | <LoQ | 6 | 3 | 5 | 3 | 2 | 28 |
| SHI-06-Smoke | <LoQ | 12 | <LoQ | <LoQ | <LoQ | 6 | 5 | 5 | 5 | 7 | 56 |
| SHI-07-Smoke | <LoQ | 9 | 3 | <LoQ | <LoQ | 7 | 3 | 8 | 8 | 4 | 63 |
| SHI-08-Smoke | <LoQ | 5 | 1 | <LoQ | <LoQ | 10 | 11 | 12 | 9 | 8 | 98 |
| SHI-09-Smoke | <LoQ | 2 | <LoQ | <LoQ | <LoQ | 10 | 9 | 13 | 17 | 6 | 118 |
| SHI-10-Smoke | <LoQ | 5 | 2 | <LoQ | <LoQ | 23 | 12 | 23 | 16 | 16 | 164 |
| SHI-11-Smoke | <LoQ | 4 | 2 | <LoQ | <LoQ | 18 | 14 | 21 | 18 | 14 | 176 |
| SHI-12-Smoke | 1 | 11 | 5 | <LoQ | <LoQ | 33 | 14 | 24 | 23 | 15 | 198 |
| SHI-13-Smoke | <LoQ | 5 | 1 | <LoQ | <LoQ | 27 | 17 | 29 | 34 | 18 | 244 |
| SHI-14-Smoke | 3 | 24 | 7 | 2 | <LoQ | 32 | 15 | 47 | 103 | 16 | 613 |
| SHI-15-Smoke | <LoQ | 5 | 3 | <LoQ | <LoQ | 30 | 27 | 62 | 144 | 25 | 864 |
| SHI-16-Smoke | 7 | 59 | 17 | 3 | 1 | 74 | 16 | 93 | 189 | 22 | 977 |

LoQ, limit of quantitation = 1 µg/kg for analytes apart from 4-methylsyringol and syringol which were 2 µg/kg; CHA: Chardonnay; PIN: Pinot Noir; SHI: Shiraz. Note syringol was below LOQ in all grape samples apart from SHI -14-Smoke where it was detected at the limit of quantification (2 µg/kg). 4-Methylsyringol was below LOQ in all of the grape samples. GuRG, guaiacol rutinoside; MGuRG, methylguaiacol rutinoside; MSyGG, methylsyringol gentiobioside; PhRG, phenol rutinoside; CrRG, cresol rutinosides; SyGG, syringol gentiobioside

###### Table S4. Study B Concentration of volatile phenols and phenolic glycosides in wines

| Sample Code | 4 – Methylguaiacol (µg/L) | Guaiacol (µg/L) | o-cresol (µg/L) | *m-cresol* (µg/L) | *p-cresol* (µg/L) | 4-Methyl-syringol (µg/L) | Syringol (µg/L) | GuRG (µg/L) | MGuRG (µg/L) | MSyGG (µg/L) | PhRG (µg/L) | CrRG (µg/L) | SyGG (µg/L) |
| --- | --- | --- | --- | --- | --- | --- | --- | --- | --- | --- | --- | --- | --- |
| CHA-01-Control | <LoQ | <LoQ | <LoQ | <LoQ | <LoQ | <LoQ | <LoQ | <LoQ | <LoQ | <LoQ | <LoQ | <LoQ | 1 |
| CHA-02-Control | <LoQ | <LoQ | <LoQ | <LoQ | <LoQ | <LoQ | <LoQ | 1 | 2 | <LoQ | <LoQ | 2 | 3 |
| CHA-03-Smoke | 1 | 5 | 3 | 3 | 2 | <LoQ | <LoQ | 7 | 9 | <LoQ | 3 | 5 | 17 |
| CHA-04-Smoke | <LoQ | 3 | 2 | 2 | 1 | <LoQ | <LoQ | 5 | 8 | 1 | 2 | 5 | 22 |
| CHA-05-Smoke | <LoQ | 1 | 2 | <LoQ | <LoQ | <LoQ | <LoQ | 5 | 10 | 2 | 4 | 6 | 26 |
| CHA-06-Smoke | <LoQ | 2 | 2 | 1 | <LoQ | <LoQ | <LoQ | 4 | 8 | 1 | 2 | 4 | 25 |
| CHA-07-Smoke | <LoQ | 2 | 2 | 1 | <LoQ | <LoQ | <LoQ | 6 | 14 | 4 | 6 | 10 | 62 |
| CHA-08-Smoke | <LoQ | 1 | <LoQ | <LoQ | <LoQ | <LoQ | <LoQ | 3 | 8 | 2 | 6 | 10 | 43 |
| CHA-09-Smoke | <LoQ | 2 | 2 | 1 | <LoQ | <LoQ | <LoQ | 8 | 17 | 5 | 7 | 11 | 74 |
| CHA-10-Smoke | 2 | 5 | 5 | 4 | 1 | 9 | 13 | 15 | 38 | 17 | 12 | 16 | 195 |
| CHA-11-Smoke | 5 | 14 | 10 | 12 | 2 | 2 | 6 | 35 | 87 | 34 | 28 | 45 | 487 |
| CHA-12-Smoke | 4 | 11 | 9 | 8 | 2 | 4 | 9 | 20 | 57 | 44 | 12 | 15 | 525 |
| PIN-01-Control | <LoQ | <LoQ | 2 | <LoQ | <LoQ | <LoQ | 2 | 1 | <LoQ | <LoQ | <LoQ | <LoQ | 1 |
| PIN-02-Control | <LoQ | 1 | 1 | <LoQ | <LoQ | <LoQ | 2 | 1 | <LoQ | <LoQ | <LoQ | <LoQ | 1 |
| PIN-03-Control | <LoQ | 2 | 3 | 1 | <LoQ | <LoQ | 3 | 2 | 1 | <LoQ | 1 | 2 | 2 |
| PIN-04-Smoke | 2 | 8 | 8 | 6 | 3 | <LoQ | 3 | 5 | 7 | 1 | 10 | 10 | 18 |
| PIN-05-Smoke | 2 | 10 | 7 | 5 | 4 | <LoQ | 4 | 6 | 8 | 1 | 11 | 10 | 20 |
| PIN-06-Smoke | 1 | 5 | 5 | 3 | 1 | <LoQ | 3 | 5 | 8 | 2 | 7 | 8 | 34 |
| PIN-07-Smoke | 2 | 7 | 7 | 3 | 3 | <LoQ | 4 | 6 | 13 | 3 | 12 | 18 | 40 |
| PIN-08-Smoke | 3 | 16 | 11 | 9 | 5 | <LoQ | 9 | 16 | 23 | 3 | 18 | 19 | 57 |
| PIN-09-Smoke | 4 | 20 | 11 | 9 | 4 | <LoQ | 6 | 12 | 24 | 8 | 11 | 13 | 104 |
| PIN-10-Smoke | 8 | 27 | 18 | 13 | 4 | 2 | 10 | 17 | 38 | 11 | 18 | 19 | 149 |
| PIN-11-Smoke | 13 | 53 | 29 | 22 | 12 | 2 | 10 | 40 | 83 | 28 | 50 | 68 | 411 |
| PIN-12-Smoke | 11 | 38 | 20 | 18 | 15 | 4 | 16 | 30 | 61 | 19 | 38 | 49 | 313 |
| SHI-01-Control | <LoQ | 12 | 1 | <LoQ | <LoQ | <LoQ | 6 | 9 | 5 | <LoQ | <LoQ | 3 | 4 |
| SHI-02-Control | <LoQ | 12 | 1 | <LoQ | <LoQ | <LoQ | 3 | 6 | 1 | <LoQ | <LoQ | 2 | 3 |
| SHI-03-Control | <LoQ | 22 | 2 | <LoQ | <LoQ | <LoQ | 5 | 7 | 1 | <LoQ | 1 | 2 | 3 |
| SHI-04-Smoke | <LoQ | 18 | 2 | <LoQ | <LoQ | <LoQ | 6 | 15 | 6 | 2 | 2 | 4 | 21 |
| SHI-05-Smoke | <LoQ | 23 | 2 | <LoQ | <LoQ | <LoQ | 5 | 17 | 9 | 3 | 3 | 6 | 32 |
| SHI-06-Smoke | 1 | 42 | 2 | 1 | 1 | 6 | 14 | 12 | 7 | 1 | 9 | 7 | 30 |
| SHI-07-Smoke | 2 | 20 | 3 | 2 | 1 | <LoQ | 6 | 12 | 10 | 4 | 5 | 5 | 49 |
| SHI-08-Smoke | <LoQ | 16 | 2 | 1 | 1 | <LoQ | 8 | 19 | 15 | 5 | 9 | 12 | 74 |
| SHI-09-Smoke | <LoQ | 11 | 2 | 1 | 1 | <LoQ | 7 | 15 | 16 | 8 | 9 | 12 | 92 |
| SHI-10-Smoke | 1 | 16 | 3 | 2 | 2 | <LoQ | 7 | 33 | 30 | 12 | 16 | 16 | 139 |
| SHI-11-Smoke | 2 | 23 | 3 | 3 | 2 | 3 | 14 | 29 | 28 | 9 | 16 | 17 | 123 |
| SHI-12-Smoke | 5 | 38 | 8 | 5 | 3 | 3 | 15 | 35 | 36 | 9 | 18 | 21 | 125 |
| SHI-13-Smoke | 1 | 20 | 2 | 1 | 2 | 3 | 15 | 31 | 34 | 13 | 17 | 20 | 154 |
| SHI-14-Smoke | 11 | 70 | 12 | 9 | 5 | 25 | 61 | 42 | 62 | 65 | 17 | 22 | 523 |
| SHI-15-Smoke | 4 | 32 | 6 | 3 | 2 | 4 | 16 | 52 | 68 | 72 | 20 | 27 | 583 |
| SHI-16-Smoke | 25 | 125 | 24 | 18 | 8 | 11 | 31 | 85 | 109 | 71 | 22 | 23 | 689 |

CHA: Chardonnay; PIN: Pinot Noir; SHI: Shiraz. LoQ, limit of quantitation = 1 µg/L for analytes apart from 4-methylsyringol and syringol which were 2 µg/L; GuRG, guaiacol rutinoside; MGuRG, methylguaiacol rutinoside; MSyGG, methylsyringol gentiobioside; PhRG, phenol rutinoside; CrRG, cresol rutinosides; SyGG, syringol gentiobioside

###### Table S5. Correlation coefficients for volatile phenols and phenolic glycosides comparing the concentrations in grapes to the concentrations in wine, for each cultivar and both studies

|  | Chardonnay  Study A | | Chardonnay  Study B | | Pinot Noir  Study A | | Pinot Noir  Study B | | Shiraz  Study A | | Shiraz  Study B | |
| --- | --- | --- | --- | --- | --- | --- | --- | --- | --- | --- | --- | --- |
|  | r | slope | r | slope | r | slope | r | slope | r | slope | r | slope |
| 4-Methylguaiacol | 0.00 | NA | 0.91 | 0.53 | 0.98 | 3.63 | 0.96 | 4.76 | 0.87 | 3.37 | 0.99 | 3.70 |
| Guaiacol | 0.75 | 0.06 | 0.95 | 0.45 | 0.99 | 2.08 | 0.98 | 2.72 | 0.99 | 4.40 | 0.97 | 2.03 |
| *o*-Cresol | 0.00 | NA | 0.98 | 0.37 | 1.00 | 0.91 | 0.98 | 0.37 | 0.99 | 1.72 | 0.99 | 1.42 |
| *m*-Cresol | 0.58 | 0.02 | 0.99 | 1.34 | 0.99 | 2.16 | 0.90 | 5.84 | 0.91 | 1.97 | 0.96 | 6.18 |
| *p*-Cresol | 0.81 | 0.14 | 0.69 | 0.43 | 0.97 | 3.75 | 0.75 | 7.67 | 0.72 | 1.75 | 0.81 | 13.00 |
| GuRG | 0.56 | 0.38 | 0.91 | 1.51 | 0.97 | 5.02 | 0.98 | 1.90 | 0.96 | 2.09 | 0.98 | 1.09 |
| MGuRG | 0.50 | 0.19 | 0.92 | 1.00 | 0.97 | 0.92 | 0.98 | 1.41 | 0.94 | 1.10 | 1.00 | 1.16 |
| MSyGG | 0.27 | 0.02 | 0.95 | 0.30 | 0.68 | 0.15 | 0.96 | 0.78 | 0.75 | 0.33 | 0.97 | 0.44 |
| PhRG | 0.75 | 0.48 | 0.92 | 1.04 | 0.99 | 0.38 | 0.99 | 0.95 | 0.81 | 0.96 | 0.97 | 0.91 |
| CrRG | 0.49 | 0.23 | 0.87 | 1.14 | 0.95 | 0.69 | 0.99 | 1.21 | 0.88 | 0.80 | 0.97 | 1.11 |
| SyGG | 0.98 | 0.29 | 0.97 | 0.65 | 0.93 | 0.40 | 0.98 | 0.82 | 0.94 | 1.00 | 0.99 | 0.71 |

GuRG, guaiacol rutinoside; MGuRG, methylguaiacol rutinoside; MSyGG, methylsyringol gentiobioside; PhRG, phenol rutinoside; CrRG, cresol rutinosides; SyGG, syringol gentiobioside

Where analytes were not detected in the sample set, they are denoted NA. Syringol and 4-methylsyringol were at or below the limit of quantification in all of the grape samples so have been excluded from this table.

###### Table S6. Mean values of the smoke aroma and flavour ratings (0-10) for the wines from study B.

| **Cultivar** | **Wine code** | **Smoke Aroma** | **Smoke Flavour** |
| --- | --- | --- | --- |
| Chardonnay | CHA-01-Control | 0.45 | 0.77 |
|  | CHA-02-Control‡ | 0.93 | 1.46 |
|  | CHA-03-Smoke | 1.65 | 2.89 |
|  | CHA-04-Smoke | 0.57 | 2.27 |
|  | CHA-05-Smoke | 0.48 | 0.90 |
|  | CHA-06-Smoke | 0.04 | 0.65 |
|  | CHA-07-Smoke | 0.40 | 0.38 |
|  | CHA-08-Smoke | 0.18 | 1.58 |
|  | CHA-09-Smoke | 0.81 | 1.49 |
|  | CHA-10-Smoke | 1.00 | 1.69 |
|  | CHA-11-Smoke | 3.77* | 5.79* |
|  | CHA-12-Smoke | 2.88* | 4.23* |
| Pinot Noir | PIN-01-Control‡ | 1.36 | 1.96 |
|  | PIN-02-Control | 1.31 | 1.18 |
|  | PIN-03-Control | 1.22 | 1.45 |
|  | PIN-04-Smoke | 1.76 | 1.99 |
|  | PIN-05-Smoke | 2.32 | 3.27* |
|  | PIN-06-Smoke | 1.09 | 1.88 |
|  | PIN-07-Smoke | 1.79 | 2.07 |
|  | PIN-08-Smoke | 2.88 | 3.84* |
|  | PIN-09-Smoke | 2.79 | 3.77* |
|  | PIN-10-Smoke | 4.79* | 5.36* |
|  | PIN-11-Smoke | 5.70* | 6.62* |
|  | PIN-12-Smoke | 4.83* | 5.02* |
| Shiraz | SHI-01-Control | 0.17 | 0.85 |
|  | SHI-02-Control‡ | 0.35 | 1.44 |
|  | SHI-03-Control† | 0.98 | 2.46 |
|  | SHI-04-Smoke | 0.00 | 1.05 |
|  | SHI-05-Smoke | 0.37 | 1.51 |
|  | SHI-06-Smoke | 1.69* | 2.51 |
|  | SHI-07-Smoke | 0.58 | 1.61 |
|  | SHI-08-Smoke | 0.52 | 1.34 |
|  | SHI-09-Smoke | 0.71 | 1.21 |
|  | SHI-10-Smoke | 0.69 | 1.69 |
|  | SHI-11-Smoke | 1.24 | 2.80 |
|  | SHI-12-Smoke | 3.09* | 4.02* |
|  | SHI-13-Smoke | 0.21 | 1.00 |
|  | SHI-14-Smoke | 3.52* | 5.37* |
|  | SHI-15-Smoke | 1.41 | 2.31 |
|  | SHI-16-Smoke | 6.72* | 7.42* |

The sensory smoke ratings of each wine are the mean values of the assessors x 2 presentation replicates. *: significantly higher than selected control using Dunnett’s means comparison test (P=0.05). ‡: control selected for comparison by Dunnett’s test. †: removed from Dunnett’s comparison due to other characteristics in the wine.
